# Supplementary material
Source: PubMed Central journal article supplement (PMC7284137)
Supplement: TBSD_A_1771424_SM7650.pdf [file TBSD_A_1771424_SM7650.pdf]

## Supplementary Information

# Fragment tailoring strategy to design novel chemical entities as potential binders of novel corona virus main protease

Chinmayee Choudhury<sup>1\*</sup>

<sup>1</sup>Department of Experimental Medicine and Biotechnology, PGIMER, Sector 12, Chandigarh-160012, India. Email: chinmayee.choudhury@gmail.com

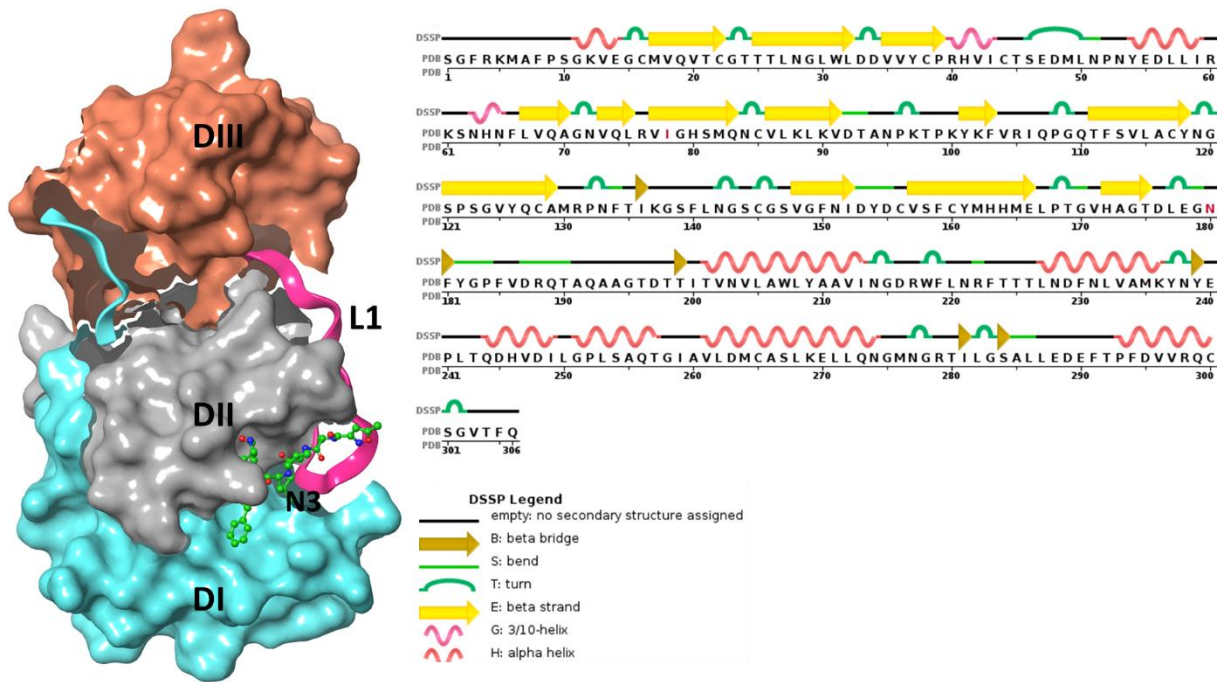

**Figure S1.** the domains and the overall secondary structure of the nCov-MP (6LU7)

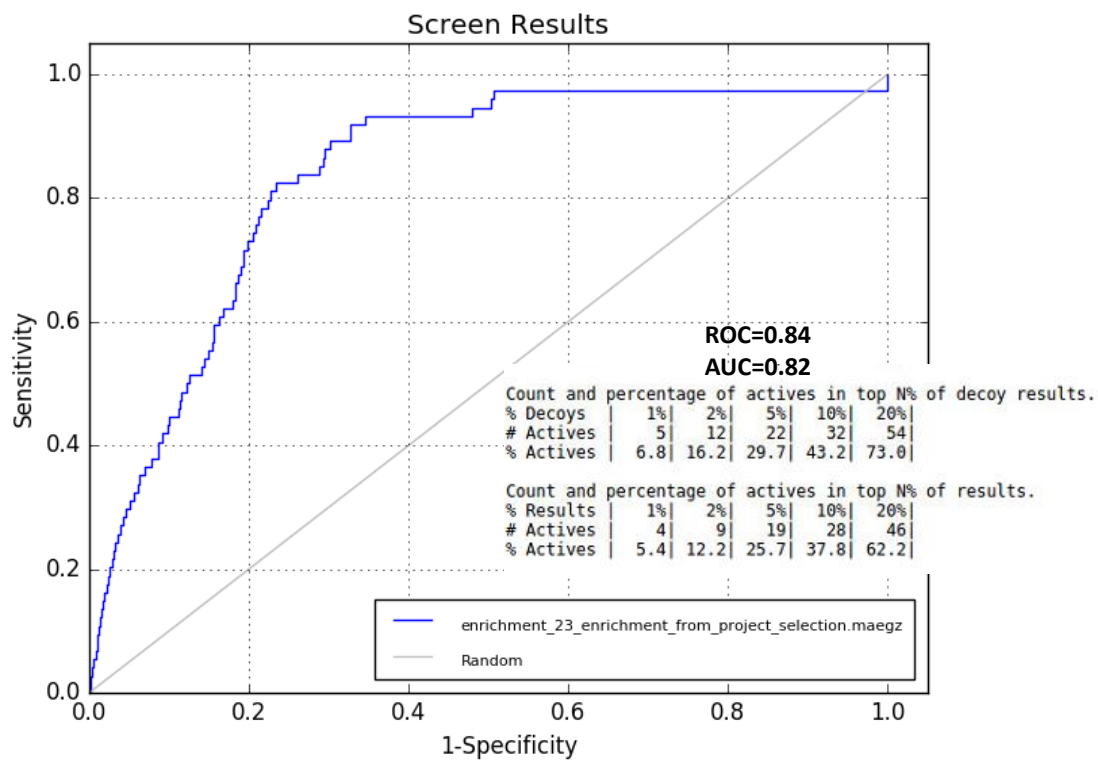

**Figure S2.** ROC curve showing the docking enrichment analysis.

**List S1.** Details of all types QuickProp descriptors calculated in this study (recommended range of value for each property is mentioned in brackets).

- **#stars** Number of property or descriptor values that fall outside the 95% range of similar values for known drugs. The following properties and descriptors are included in the determination of #stars: MW, dipole, IP, EA, SASA, FOSA, FISA, PISA, WPSA, PSA, volume, #rotor, donorHB, acptHB, glob, QPpolrz, QPlogPC16, QPlogPoct, QPlogPw, QPlogPo/w, logS, QPLogKhsa, QPlogBB, #metabol (0 – 5)
- **#rotor** Number of non-trivial (not CX3), non-hindered (not alkene, amide, small ring) rotatable bonds. (0 – 15)
- **mol\_MW** Molecular weight of the molecule. (130.0 – 725.0)
- **SASA** Total solvent accessible surface area (SASA) in square angstroms using a probe with a 1.4 Å radius. (300.0 – 1000.0)
- **FOSA** Hydrophobic component of the SASA (saturated carbon and attached hydrogen). (0.0 – 750.0)
- **FISA** Hydrophilic component of the SASA (SASA on N, O, and H on heteroatoms). (7.0 – 330.0)
- **PISA** (carbon and attached hydrogen) component of the SASA. (0.0 – 450.0)
- **WPSA** Weakly polar component of the SASA (halogens, P, and S). (0.0 – 175.0)
- **volume** Total solvent-accessible volume in cubic angstroms using a probe with a 1.4 Å radius. (500.0 – 2000.0)
- **donorHB** Estimated number of hydrogen bonds that would be donated by the solute to water molecules in an aqueous solution. Values are averages taken over a number of configurations, so they can be non-integer. (0.0 – 6.0)
- **acptHB** Estimated number of hydrogen bonds that would be accepted by the solute from water molecules in an aqueous solution. Values are averages taken over a number of configurations, so they can be non-integer. (2.0 – 20.0)
- **glob** Globularity descriptor. (0.75 – 0.95)
- **QPpolrz** Predicted polarizability in cubic angstroms. (13.0 – 70.0)
- **QPlogPC16** Predicted hexadecane/gas partition coefficient. (4.0 – 18.0)
- **QPlogPoct** Predicted octanol/gas partition coefficient. (8.0 – 35.0)
- **QPlogPw** Predicted water/gas partition coefficient. (4.0 – 45.0)
- **QPlogPo/w** Predicted octanol/water partition coefficient. (–2.0 – 6.5)
- **QPlogS** Predicted aqueous solubility, log S. S in mol dm<sup>-3</sup> is the concentration of the solute in a saturated solution that is in equilibrium with the crystalline solid. (–6.5 – 0.5)
- **CIQPlogS** Conformation-independent predicted aqueous solubility, log S. S in mol dm<sup>-3</sup> is the concentration of the solute in a saturated solution that is in equilibrium with the crystalline solid. (–6.5 – 0.5)
- **QPlogHERG** Predicted IC<sub>50</sub> value for blockage of HERG K<sup>+</sup> channels. (concern below –5)
- **QPpCaco** Predicted apparent Caco-2 cell permeability in nm/sec. Caco-2 cells are a model for the gut-blood barrier. QikProp predictions are for non-active transport. (<25 poor, >500 great)
- **QPlogBB** Predicted brain/blood partition coefficient. (–3.0 – 1.2)
- **QPpMDCK** Predicted apparent MDCK cell permeability in nm/sec. MDCK cells are considered to be a good mimic for the bloodbrain barrier. QikProp predictions are for non-active transport. (<25 poor, >500 great)
- **QPlogKp** Predicted skin permeability, log K<sub>p</sub>. (–8.0 – –1.0)
- **QPlogKhsa** Prediction of binding to human serum albumin. (–1.5 – 1.5)
- **HumanOralAbsorption** Predicted qualitative human oral absorption: 1, 2, or 3 for low, medium, or high.
- **PercentHuman-OralAbsorption** Predicted human oral absorption on 0 to 100% scale. The prediction is based on a quantitative multiple linear regression model. This property usually correlates well with HumanOralAbsorption, as both measure the same property. (>80% is high, <25% is poor)
- **PSA** Van der Waals surface area of polar nitrogen and oxygen atoms. (7.0 – 200.0)
- **RuleOfFive** Number of violations of Lipinski's rule of five. The rules are: mol\_MW < 500, QPlogPo/w < 5, donorHB ≤ acptHB ≤ 10. Compounds that satisfy these rules are considered druglike. (maximum is 4)

**Table S1.** Various components of the XP docking score and MM-GBSA binding energy.

| Name    | XP<br>GScore | XP<br>HBond | XP<br>Electro | XP<br>Lipophilic<br>EvdW | MMGBS<br>A dG<br>Bind | MMGBSA dG<br>Bind Coulomb | MMGBSA<br>dG Bind<br>Hbond | MMGBSA<br>dG Bind vdW | MMGBSA<br>dG Bind Lipo | Prime<br>MMGBSA<br>ligand efficiency |
|---------|--------------|-------------|---------------|--------------------------|-----------------------|---------------------------|----------------------------|-----------------------|------------------------|--------------------------------------|
| MP-In1  | -10.68       | -1.53       | -1.19         | -6.51                    | -80.97                | -48.08                    | -1.72                      | -61.70                | -21.00                 | -2.13                                |
| MP-In2  | -10.61       | -2.40       | -2.45         | -5.95                    | -80.02                | -52.00                    | -4.89                      | -58.19                | -17.72                 | -1.95                                |
| MP-In3  | -11.03       | -2.22       | -2.63         | -5.55                    | -79.11                | -50.14                    | -2.86                      | -58.08                | -19.92                 | -2.20                                |
| MP-In4  | -11.10       | -2.36       | -1.30         | -5.56                    | -76.54                | -58.53                    | -4.20                      | -54.76                | -16.79                 | -2.39                                |
| MP-In5  | -11.14       | -1.90       | -1.03         | -6.93                    | -76.29                | -45.05                    | -3.08                      | -61.31                | -21.45                 | -2.12                                |
| MP-In6  | -11.57       | -2.55       | -1.70         | -4.71                    | -75.94                | -79.68                    | -4.40                      | -46.23                | -21.33                 | -2.45                                |
| MP-In7  | -11.90       | -3.42       | -1.39         | -6.07                    | -75.92                | 3.82                      | -3.53                      | -63.89                | -25.57                 | -1.81                                |
| MP-In8  | -10.35       | -1.67       | -2.00         | -6.32                    | -75.61                | -1.37                     | -3.25                      | -77.24                | -25.26                 | -2.04                                |
| MP-In9  | -10.73       | -1.77       | -1.95         | -6.45                    | -75.57                | -48.17                    | -5.07                      | -53.74                | -22.53                 | -1.99                                |
| MP-In10 | -11.29       | -2.52       | -1.85         | -5.98                    | -74.69                | -69.20                    | -2.92                      | -47.31                | -20.99                 | -2.41                                |
| MP-In11 | -11.46       | -2.99       | -1.61         | -5.36                    | -74.01                | -61.58                    | -3.91                      | -49.53                | -19.09                 | -2.39                                |
| MP-In12 | -10.10       | -1.56       | -1.18         | -6.17                    | -72.28                | -1.17                     | -1.58                      | -64.71                | -25.42                 | -1.95                                |
| MP-In13 | -11.11       | -1.88       | -2.68         | -4.78                    | -71.68                | -59.21                    | -2.40                      | -62.89                | -14.86                 | -1.75                                |
| MP-In14 | -11.63       | -1.89       | -1.39         | -5.60                    | -71.12                | -90.87                    | -2.97                      | -63.15                | -15.81                 | -1.65                                |
| MP-In15 | -10.05       | -1.67       | -1.50         | -5.71                    | -70.85                | -4.01                     | -1.87                      | -67.26                | -26.38                 | -1.73                                |
| MP-In16 | -11.68       | -2.92       | -1.49         | -5.73                    | -70.42                | -57.54                    | -3.53                      | -47.14                | -19.55                 | -2.52                                |
| MP-In17 | -10.74       | -0.86       | -0.64         | -7.26                    | -69.92                | -5.22                     | -1.11                      | -62.04                | -22.56                 | -1.84                                |

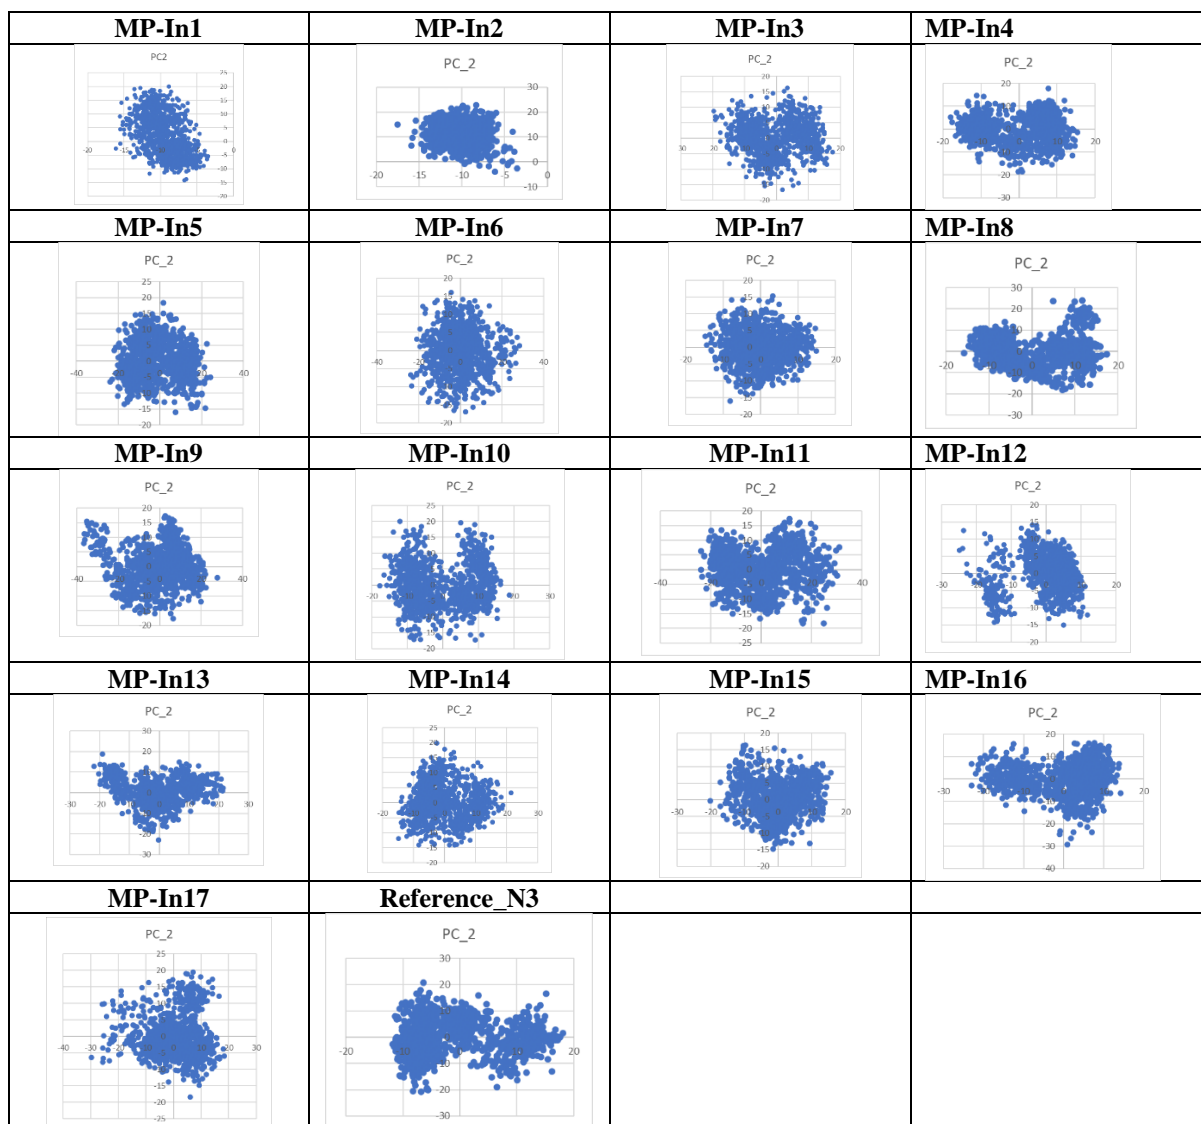

**Figure S3.** Projection of the motion for  $C\alpha$  aoms of the protein bound to the 18 ligands (including one reference structure 6LU7) in phase space along the PC1 and PC2.

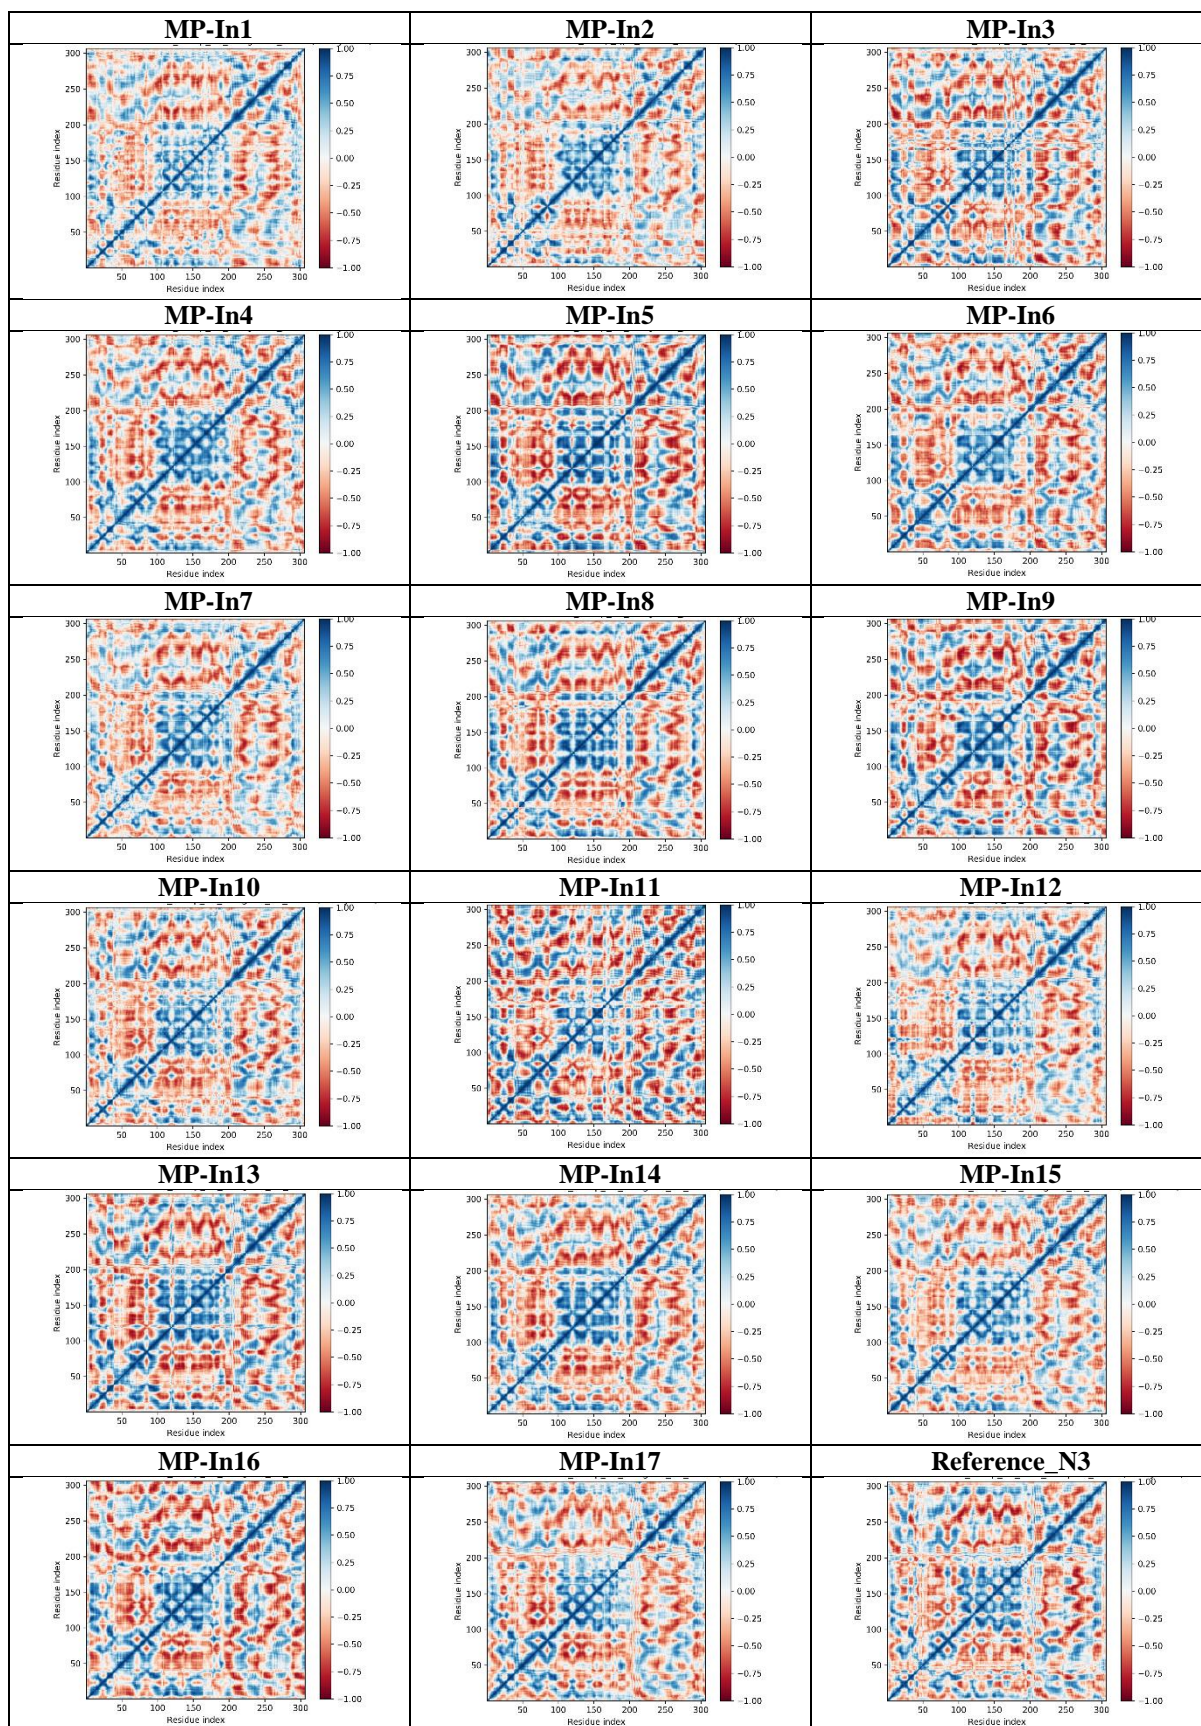

**Figure S4.** Cross-correlation plots for the 18 complexes

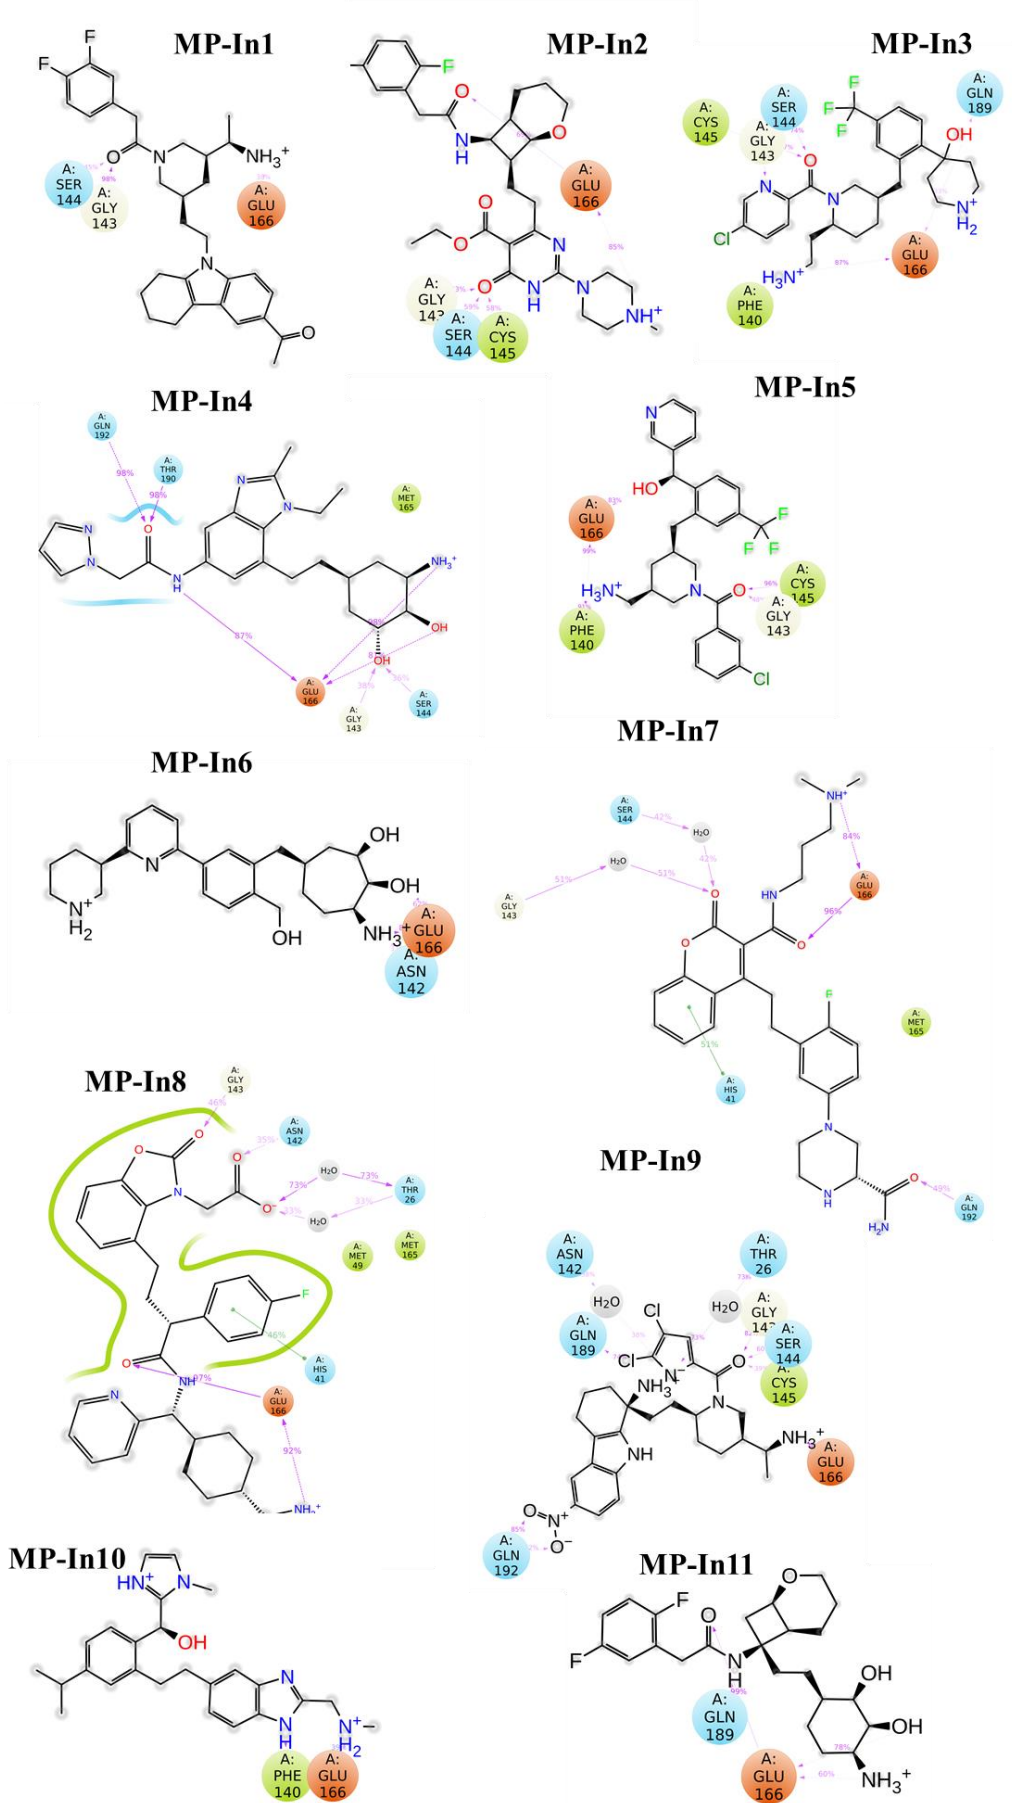

Figure continues ...

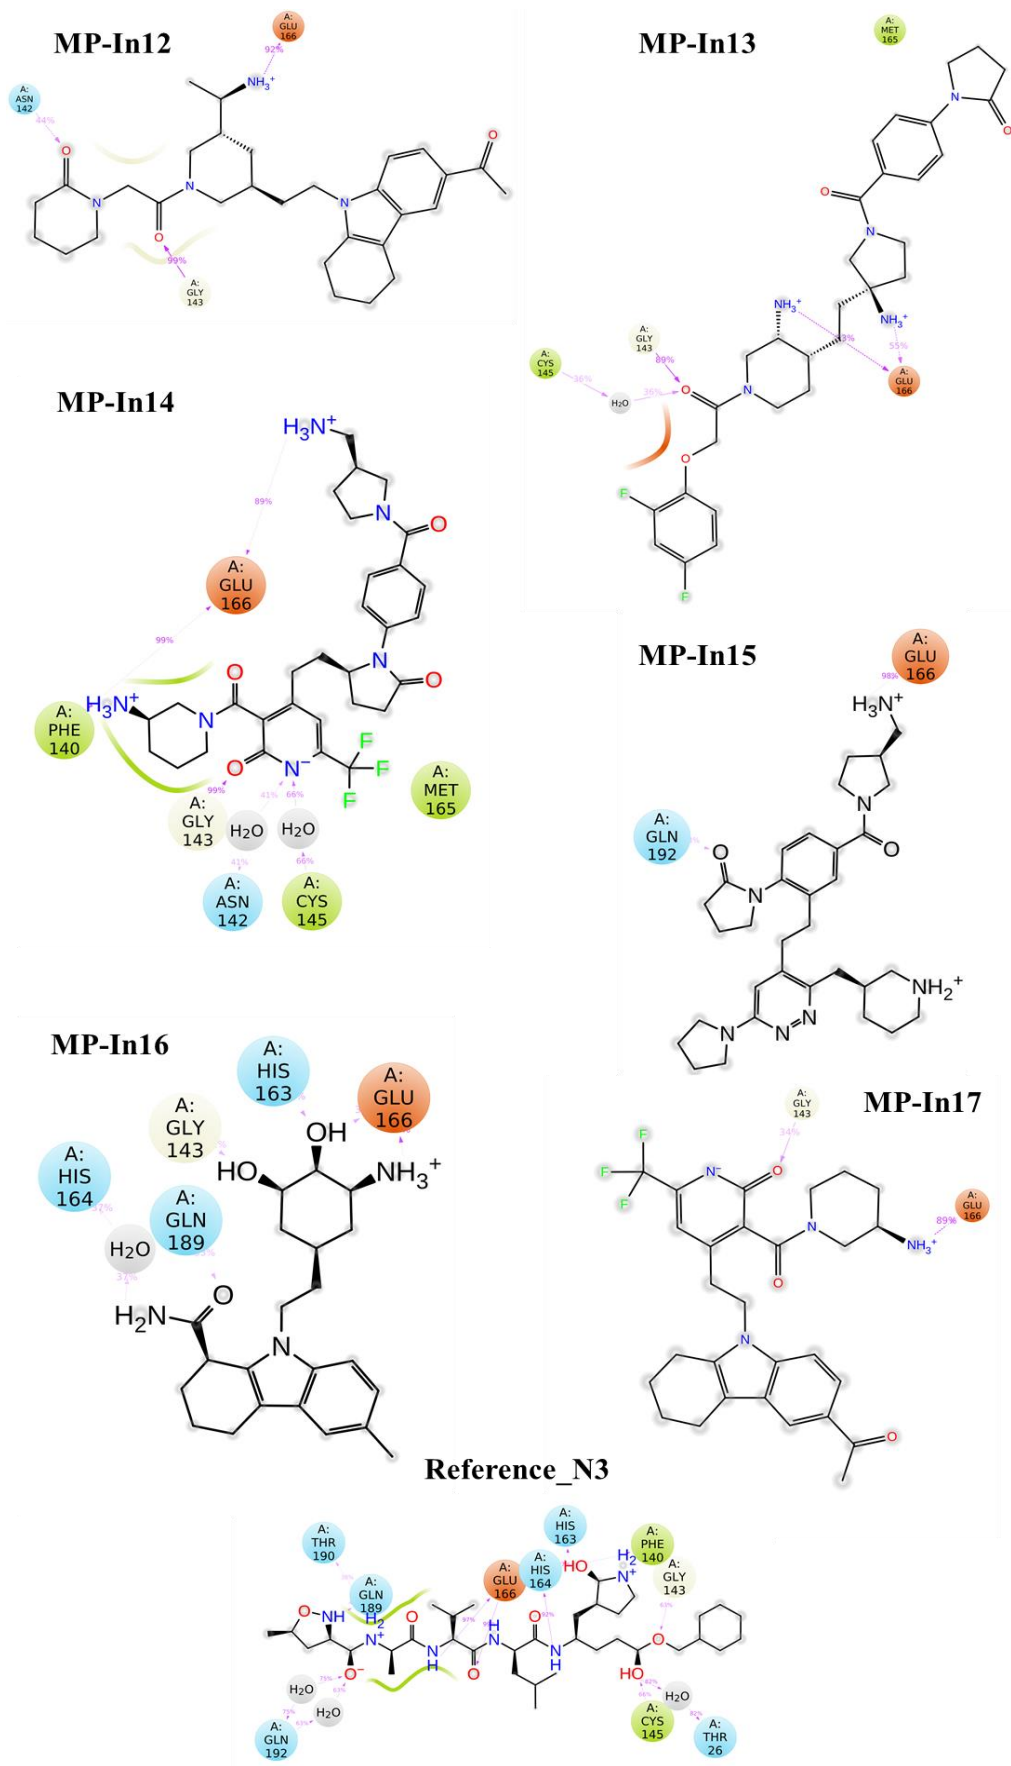

**Figure S5.** Interactions that occur more than 30% of the simulation time in each trajectory through 0 to 50 ns
